# Supplementary material for: Repurposing BH3 mimetics to deplete tumour-infiltrating regulatory T cells and enhance anti-tumour immunity in non-small cell lung cancer
Source: Research Square preprint supplement (doi:10.21203/rs.3.rs-8313340/v1), 2025-12-12
Supplement: Supplementary file 1 [file 0a032d10046c9ccd90ff61f4.docx]

| Patients | **n=18** |
| --- | --- |
| Sex | 6M, 12F |
| Age (mean, range) | 65.4 (47 – 83) |
| *Lung cancer subtype*  adenocarcinoma  squamous cell carcinoma  adenocarcinoma + squamous cell carcinoma | 15  2  1 |
| *Stage*  I  II  IIIa  IV  n/a | 4  8  5  -  1 |

**Supplementary Table 1:** Patient details for non-malignant lung and early-stage lung tumour analyses by mass cytometry. All tissue acquired from surgical resections

| Patients | **n=6** |
| --- | --- |
| Sex | 5M, 1F |
| Age (mean, range) | 65.8 (39 – 86) |
| *Colorectal adenocarcinoma location*  Ascending colon  Transverse colon  Descending colon  Sigmoid colon | 3  1  1  1 |
| *Stage*  I  IIa  IIIb  IIIc  IV | 1  2  2  1  - |

**Supplementary Table 2:** Patient details for non-malignant colon and early-stage colorectal tumour analyses by flow cytometry. All tissue acquired from surgical resections.

| ***human CyTOF antibodies*** | | | | | |
| --- | --- | --- | --- | --- | --- |
| ***cell classification*** | | | | | |
| **antigen** | **clone** | **conjugate** | **manufacturer** | **catalog #** | **dilution** |
| EpCam | 9C4 | 141 Pr | Fluidigm | 3141006B | 1/100 |
| Pan keratin | C11 | 162 Dy | Fluidigm | 3162027A | 1/100 |
| p63* | EPR5701 | 165 Ho | Abcam | ab214790 | 1/25 |
| TTF1* | EP1584Y | 173 Yb | Abcam | ab186822 | 1/100 |
| HLA-A,B,C* | W6/32 | 150 Nd | WEHI | n/a | 1/100 |
| CD45 | HI30 | 89 Y | Fluidigm | 3089003B | 1/100 |
| CD11a | H111 | 142 Nd | Fluidigm | 3142006B | 1/100 |
| CD16 | 3G8 | 209 Bi | Fluidigm | 3209002B | 1/100 |
| NKp46* | 9E2 | 166 Er | Biolegend | 331902 | 1/50 |
| HLA-DR* | L243 | In115 | Biolegend | 307602 | 1/50 |
| CD3* | UCHT1 | 139 La | Biolegend | 300443 | 1/50 |
| CD4 | RPA-T4 | 145 Nd | Fluidigm | 3145001B | 1/100 |
| CD8a | RPA-T8 | 146 Nd | Fluidigm | 3146001B | 1/100 |
| CD127 | A019D5 | 176 Yb | Fluidigm | 3176004B | 1/100 |
| CD25 | 2A3 | 169 Tm | Fluidigm | 3169003B | 1/100 |
| CD45RO | UCHL1 | 149 Sm | Fluidigm | 3149001B | 1/100 |
| CD45RA | HI100 | 143 Nd | Fluidigm | 3143006B | 1/100 |
| CCR7 | G043H7 | 159 Tb | Fluidigm | 3159003A | 1/100 |
| ***lymphocyte phenotyping*** | | | | | |
| CD69 | FN50 | 144 Nd | Fluidigm | 3144018B | 1/100 |
| TBET | 4B10 | 161 Dy | Fluidigm | 3161014B | 1/100 |
| CD28 | CD28.2 | 160 Gd | Fluidigm | 3160003B | 1/100 |
| 4-1BB* | 4B4-1 | 164 Dy | Biolegend | 309802 | 1/50 |
| OX40* | ACT35 | 174 Yb | Biolegend | 350015 | 1/50 |
| CD27 | L128 | 167 Er | Fluidigm | 3167006B | 1/100 |
| ICOS | C398.4A | 148 Nd | Fluidigm | 3148019B | 1/100 |
| CTLA-4 | 14D3 | 170 Er | Fluidigm | 3170005B | 1/100 |
| PD-1 | EH12.2H7 | 155 Gd | Fluidigm | 3155009B | 1/100 |
| CD57 | HCD57 | 163 Dy | Fluidigm | 3163022B | 1/100 |
| Lag3* | 11C3C65 | 151 Eu | Biolegend | 369302 | 1/50 |
| Tim3 | F38-2E2 | 153 Eu | Fluidigm | 3153008B | 1/100 |
| ***other phenotyping markers*** | | | | | |
| Sox2* | 14A6A34 | 150Nd | Biolegend | 656102 | 1/100 |
| PDL1 | 29E.2A3 | 156 Gd | Fluidigm | 3156026B | 1/100 |
| Ki67 | B56 | 168 Er | Fluidigm | 3168007B | 1/100 |
| cl-caspase3 | 5A1E | 172 Yb | Fluidigm | 3172023A | 1/100 |
| pERK | D13.14.4E | 171 Yb | Fluidigm | 3171010A | 1/100 |
| pAKT | D9E | 152 Sm | Fluidigm | 3152005A | 1/100 |
| pSTAT3 | 4/P-STAT3 | 158 Gd | Fluidigm | 3158005A | 1/100 |
| pSTAT5 | 47 | 147 Sm | Fluidigm | 3147012A | 1/100 |
| pS6 | N7-548 | 175 Lu | Fluidigm | 3175009A | 1/100 |
| Bcl-xl* | E18 | 140 Ce | Abcam | ab199099 | 1/100 |
| Mcl-1* | Y37 | 154 Sm | Abcam | ab199099 | 1/100 |
| Bcl-2* | clone100 | 157 Gd | WEHI | n/a | 1/100 |

**Supplementary Table 3:** Mass Cytometry antibodies against human antigens. *indicates in-house conjugated antibodies, prepared at a concentration of 0.1 – 0.4 mg/mL

| **Drug** | **Dose** | **Schedule** | **Route** | **Vehicle** |
| --- | --- | --- | --- | --- |
| ***In vivo*** | | | | |
| ABT-199 (Active Biochem) | 50 mg/kg | 5 consecutive days | Oral gavage | 10%(v/v) ETOH  30%(v/v) PEG400  60%(v/v) Phosal  50PG |
| S63845  (Active  Biochem) | 25mg/kg | Twice a week  for 1 week or  6 weeks | Intravenous  injection | 2%(w/v) VitE-TPGS  0.9%(w/v) NaCl |
| A-1331852  (WEHI) | 25mg/kg | 5  consecutive  days | Oral gavage | 2.5%(v/v) DMSO  10%(v/v) ETOH  27.5%(v/v) PEG400  60%(v/v) Phosal 50PG |
| Anti-PD1  (Bio X Cell) | 200µg/mouse | 3 times a  week for 1 week or 6  weeks | Intraperitoneal  Injec tion | Anti-Rat IgG (Bio X Cell)  PBS |
| ***In vitro (human)*** | | | | |
| ABT-199 (Active Biochem) | Serial dilution: 10-100 nM |  | *In vitro* culture | 0.1% DMSO |
| S63845  (Active  Biochem) | Serial dilution: 10-100 nM |  | *In vitro* culture | 0.1% DMSO |
| A-1331852  (WEHI) | Serial dilution: 10-100 nM |  | *In vitro* culture | 0.1% DMSO |

**Supplementary Table 4:** Drug treatment schedules for *in vivo*, *in vitro* and *ex vivo* work.

| ***Human flow cytometry antibodies*** | | | | | |
| --- | --- | --- | --- | --- | --- |
| **antigen** | **clone** | **conjugate** | **manufacturer** | **catalog #** | **dilution** |
| CD3 | UCHT1 | BV570 | Biolegend | 300436 | 1/50 |
| CD4 | OK  T4 | PE-Cy5 | Biolegend | 317412 | 1/50 |
| CD8 | SK1 | PerCP Cy5.5 | Biolegend | 344710 | 1/50 |
| CD25 | BC96 | BV605 | Biolegend | 302632 | 1/50 |
| CD31 | WM59 | PE | BD | 555446 | 1/40 |
| CD45 | HI30 | Alexa 532 | eBiosciences | 58-0459-42 | 1/100 |
| CD45RA | HI100 | APC-Cy7 | Biolegend | 304128 | 1/100 |
| CD235a | GA-R2 | PE | BD | 555570 | 1/120 |
| CD140b | 28D4 | PE | BD | 558821 | 1/80 |
| EpCAM | 9C4 | Alexa700 | Biolegend | 324244 | 1/40 |
| PD1 | EH12.2H7 | PE | Biolegend | 329906 | 1/100 |
| ***Intracellular antigens*** | | | | | |
| Foxp3 | 206D | BV421 | Biolegend | 320124 | 1/50 |
| Ki67 | B56 | V450 | BD | 561281 | 1/100 |

**Supplementary Table 5:** Flow cytometry antibodies against human antigens. *indicates in-house conjugated antibodies, prepared at a concentration of 0.1 – 0.4 mg/mL.

| **Cell Subset Analysed** | **Phenotype** |
| --- | --- |
| Effector CD4+ T conv. | CD31-, CD235a-, CD140b-, EpCAM-, CD45+, CD45RA-, CD3+, CD4+, CD25-, FOXP3- |
| Tregs | CD31-, CD235a-, CD140b-, EpCAM-, CD45+, CD3+, CD4+, CD25+, FOXP3+ |
| Effector CD8+ T cells | CD31-, CD235a-, CD140b-, EpCAM-, CD45+, CD45RA-, CD3+, CD8+ |

**Supplementary Table 6:** Flow cytometry gating strategy for human lung and colorectal tumour samples

| ***Murine flow cytometry antibodies*** | | | | | |
| --- | --- | --- | --- | --- | --- |
| **antigen** | **clone** | **conjugate** | **manufacturer** | **catalog #** | **dilution** |
| CD3 | 17A2 | Alexa Fluor 532 | eBioscience | 58-0032-  82 | 1/200 |
| CD4 | RM4-5 | PerCP-Cy5.5 | Biolegend | 100540 | 1/400 |
| CD8a | 53-6.7 | BV650 | Biolegend | 100742 | 1/400 |
| CD25 | BC96 | BV605 | Biolegend | 102042 | 1/200 |
| CD44 | IM7 | Alexa Fluor 700 | Biolegend | 103026 | 1/200 |
| CD45 | 30F-11 | BV570 | Biolegend | 103135 | 1/400 |
| CD62L | MEL-14 | ACP-Cy7 | Biolegend | 104428 | 1/200 |
| EpCAM | G8.8 | BV711 | Biolegend | 118233 | 1/200 |
| ICOS | 7E.17G9 | PerCP-eFluor710 | eBioscience | 46-9942-82 | 1/200 |
| KLRG1 | 2F1 | BV711 | BD | 564014 | 1/400 |
| PD1 | 29F1A12 | BV605 | Biolegend | 135220 | 1/100 |
| ST2-bio | RMST2-2 | Biotin (BV786) | eBioscience | 13-9335-82 | 1/100 |
| ***Intracellular antigens*** | | | | | |
| BCL-2 | 10C4 | PE-Cy7 | eBioscience | 25-6992-42 | 1/50 or 1/250** |
| BCL-xL | E18 | PE | Abcam | ab208747 | 1/100 or 1/500** |
| Foxp3 | FJK-16s | eFluor450 | eBioscience | 48-573-82 | 1/400 or 1/2000** |
| Ki67 | B56 | BV786 | BD | 563756 | 1/200 |
| MCL-1* | 19C4-15 | Alexa Fluor 647 | WEHI | N/A | 1/250 or 1/1250** |
| ***Secondary antibodies*** | | | | | |
| SA | N/A | BV786 | BD | 563858 | 1/300 |

**Supplementary Table 7:** Flow cytometry antibodies against murine antigens. * indicates in-house conjugated antibodies, prepared at a concentration of 0.1 – 0.4 mg/mL. ** indicates concentration of antibody used for overnight staining after intracellular fixation and permeabilisation.

| **Cell Subset Analysed** | **Phenotype** |
| --- | --- |
| T cells | CD45+, CD3+ |
| CD4+ T cells | CD45+, CD3+, CD4+ |
| CD4+ T conv. | CD45+, CD3+, CD4+, CD25-, FOXP3- |
| Naïve CD4+ T conv. | CD45+, CD3+, CD4+, CD25-, FOXP3-, CD44-, CD62L+ |
| Central Memory CD4+ T conv. | CD45+, CD3+, CD4+, CD25-, FOXP3-, CD44+, CD62L+ |
| Effector/Effector Memory CD4+ T conv. | CD45+, CD3+, CD4+, CD25-, FOXP3-, CD44+, CD62L- |
| Tregs | CD45+, CD3+, CD4+, CD25+, FOXP3+ |
| Naïve Tregs | CD45+, CD3+, CD4+, CD25+, FOXP3+, ICOS-, CD62L+ |
| Activated Tregs | CD45+, CD3+, CD4+, CD25+, FOXP3+, ICOS-, CD62L- |
| Effector Tregs | CD45+, CD3+, CD4+, CD25+, FOXP3+, ICOS+, CD62L- |
| CD8+ T cells | CD45+, CD3+, CD8+ |
| Naïve CD8+ T cells | CD45+, CD3+, CD8+, CD44-, CD62L+ |
| Central Memory CD8+ T cells | CD45+, CD3+, CD8+, CD44+, CD62L+ |
| Effector/Effector Memory CD8+ T cells | CD45+, CD3+, CD8+, CD44+, CD62L- |

**Supplementary Table 8:** Flow cytometry gating strategy for murine lung and spleen samples

| **Cycle** | **Antigen Retrieval pH** | **Primary Antibody** | **Secondary Antibody** | **Opal Fluorochrome** |
| --- | --- | --- | --- | --- |
| 1 | pH 9 | E-cadherin | Vector Impress anti-rat MP-7404-50 | Opal 690 |
| Clone: ECC100 |
| Dilution: 1/500 |
|  |  | Ki67 | Opal HRP anti-ms + rabbit |  |
| 2 | pH 9 | Clone: D3B5 | ARH1001EA | Opal 620 |
|  |  | Dilution: 1/200 |  |  |
|  |  | PD1 | Opal HRP anti-ms + rabbit |  |
| 3 | pH 9 | Clone: EPR20665 | ARH1001EA | Opal 520 |
|  |  | Dilution: 1/500 |  |  |
|  |  | CD8 | Opal HRP anti-ms + rabbit |  |
| 4 | pH 6 | Clone: EPR20305 | ARH1001EA | Opal 480 |
|  |  | Dilution: 1/250 |  |  |
|  |  | CD4 | Opal HRP anti-ms + rabbit |  |
| 5 | pH 6 | Clone: EPR19514 | ARH1001EA | Opal 570 |
|  |  | Dilution: 1/500 |  |  |
|  |  | FoxP3 | Vector Impress anti-rat |  |
| 6 | pH 9 | Clone: FJK-16s | MP-7404-50 | Opal TSA-DIG |
|  |  | Dilution: 1/25 |  |  |
| 7 | pH 6 | N/A | N/A | Opal 780 |

**Supplementary Table 9:** Opal mIF cycles and conditions used for staining against murine antigens.
